# Supplementary material for: Epicardioid single-cell genomics uncovers principles of human epicardium biology in heart development and disease
Source: PubMed Central journal article supplement (PMC10713454; doi:10.1038/s41587-023-01718-7), 2023-04-03
Supplement: 41587_2023_1718_MOESM1_ESM.pdf [file 41587_2023_1718_MOESM1_ESM.pdf]

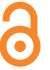

---

# **Epicardioid single-cell genomics uncovers principles of human epicardium biology in heart development and disease**

---

In the format provided by the authors and unedited

---

## Supplementary Results

### Modulation of RA signaling during 3D cardiac induction

Considering the major role of RA in the formation of epicardioids, we tested the effects of modulating RA timing and dosage during differentiation. Limiting RA exposure to days 2 and 3 of differentiation led to larger, looser spheroids that rarely formed an epicardial layer (Supplementary Fig. 1a-d). By contrast, increasing the concentration of RA to 1  $\mu$ M on days 2 to 5 resulted in smaller spheroids and slightly reduced the efficiency of epicardium formation (Supplementary Fig. 1a-d). This was reflected in the expression levels of epicardial markers (*BNC1*, *TBX18*, *WT1*) on day 15, which were highest when applying 0.5  $\mu$ M RA on days 2 to 5 (Supplementary Fig. 1e).

### Generation and validation of the AAVS1-CAG-FRT-flanked STOP-mKate2-HA hiPSC line

We used CRISPR/Cas9 gene editing to generate a hiPSC reporter line based on the flippase-mediated recombination system (Flp/FRT). A reporting construct consisting of an FRT-flanked neomycin cassette blocking transcription of a pCAG-driven fluorescent reporter (mKate2) fused to an HA-tag was knocked into the AAVS1 safe harbor locus<sup>49</sup> (Supplementary Fig. 4a,b). After editing, we verified that the hiPSCs maintained a normal karyotype (Supplementary Fig. 4c) and did not carry mutations in the top predicted off-target sites (Supplementary Fig. 4d). Reporter functionality was confirmed by the detection of mKate2 and the HA-tag following transfection with a vector encoding flippase (Supplementary Fig. 4e,f). After validation, the reporter line was entered into the Human Pluripotent Stem Cell Registry under the ID MRIi003-A-9.

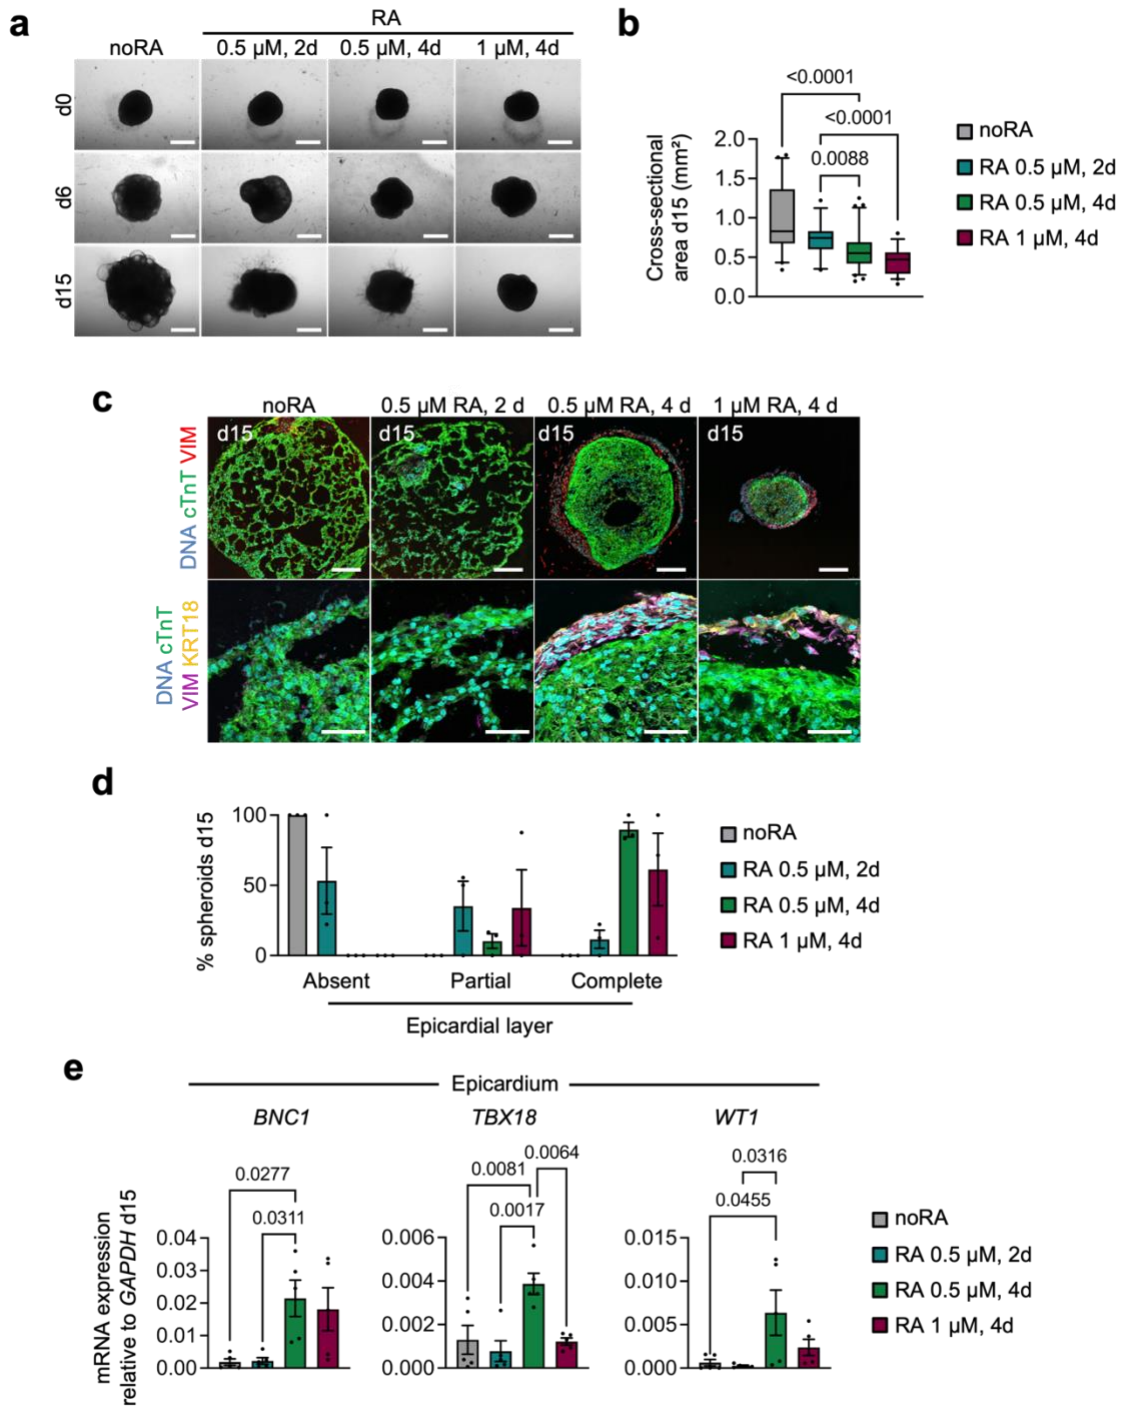

**Supplementary Figure 1. Effects of retinoic acid dosage and timing on the formation of epicardial cells during 3D cardiac differentiation.** (a) Representative bright field pictures of spheroids at days 0, 6, and 15 of cardiac differentiation without retinoic acid (noRA), with 0.5  $\mu$ M RA days 2 and 3 (2d) or days 2 to 5 (4d), or with 1  $\mu$ M RA days 2 to 5 (4d). Scale bars = 500  $\mu$ m. (b) Cross-sectional area of spheroids at day 15 of differentiation without retinoic acid (noRA; N =

43 spheroids), with 0.5  $\mu\text{M}$  RA 2d (N = 33 spheroids), with 0.5  $\mu\text{M}$  RA 4d (N = 70 spheroids), or with 1  $\mu\text{M}$  RA 4d (N = 39 spheroids); 3 independent differentiations per group. Box plots indicate the median, 25<sup>th</sup> and 75<sup>th</sup> percentile, with whiskers extending to the 5<sup>th</sup> and 95<sup>th</sup> percentiles; Kruskal-Wallis test with Dunn's multiple comparisons test. **(c,d)** Representative images of immunostaining for cardiac troponin T (cTnT) and vimentin (VIM) (top) or cTnT, VIM, and cytokeratin 18 (KRT18) (bottom) at day 15 of differentiation without retinoic acid (noRA), with 0.5  $\mu\text{M}$  RA 2d, with 0.5  $\mu\text{M}$  RA 4d, or with 1  $\mu\text{M}$  RA 4d. Scale bars top = 200  $\mu\text{m}$ , bottom = 50  $\mu\text{m}$ . **(c)** Corresponding percentage of spheroids with an absent, partial or complete epicardial layer at day 15. Mean  $\pm$  SEM; N = 3 independent differentiations per group. **(d) (e)** mRNA expression of the epicardial markers *BNC1*, *TBX18*, and *WT1* relative to *GAPDH* at day 15 of differentiation without retinoic acid (noRA), with 0.5  $\mu\text{M}$  RA 2d, with 0.5  $\mu\text{M}$  RA 4d, or with 1  $\mu\text{M}$  RA 4d. Mean  $\pm$  SEM; N = 5 from 3 independent differentiations per group; one-way ANOVA with Tukey's multiple comparisons test.

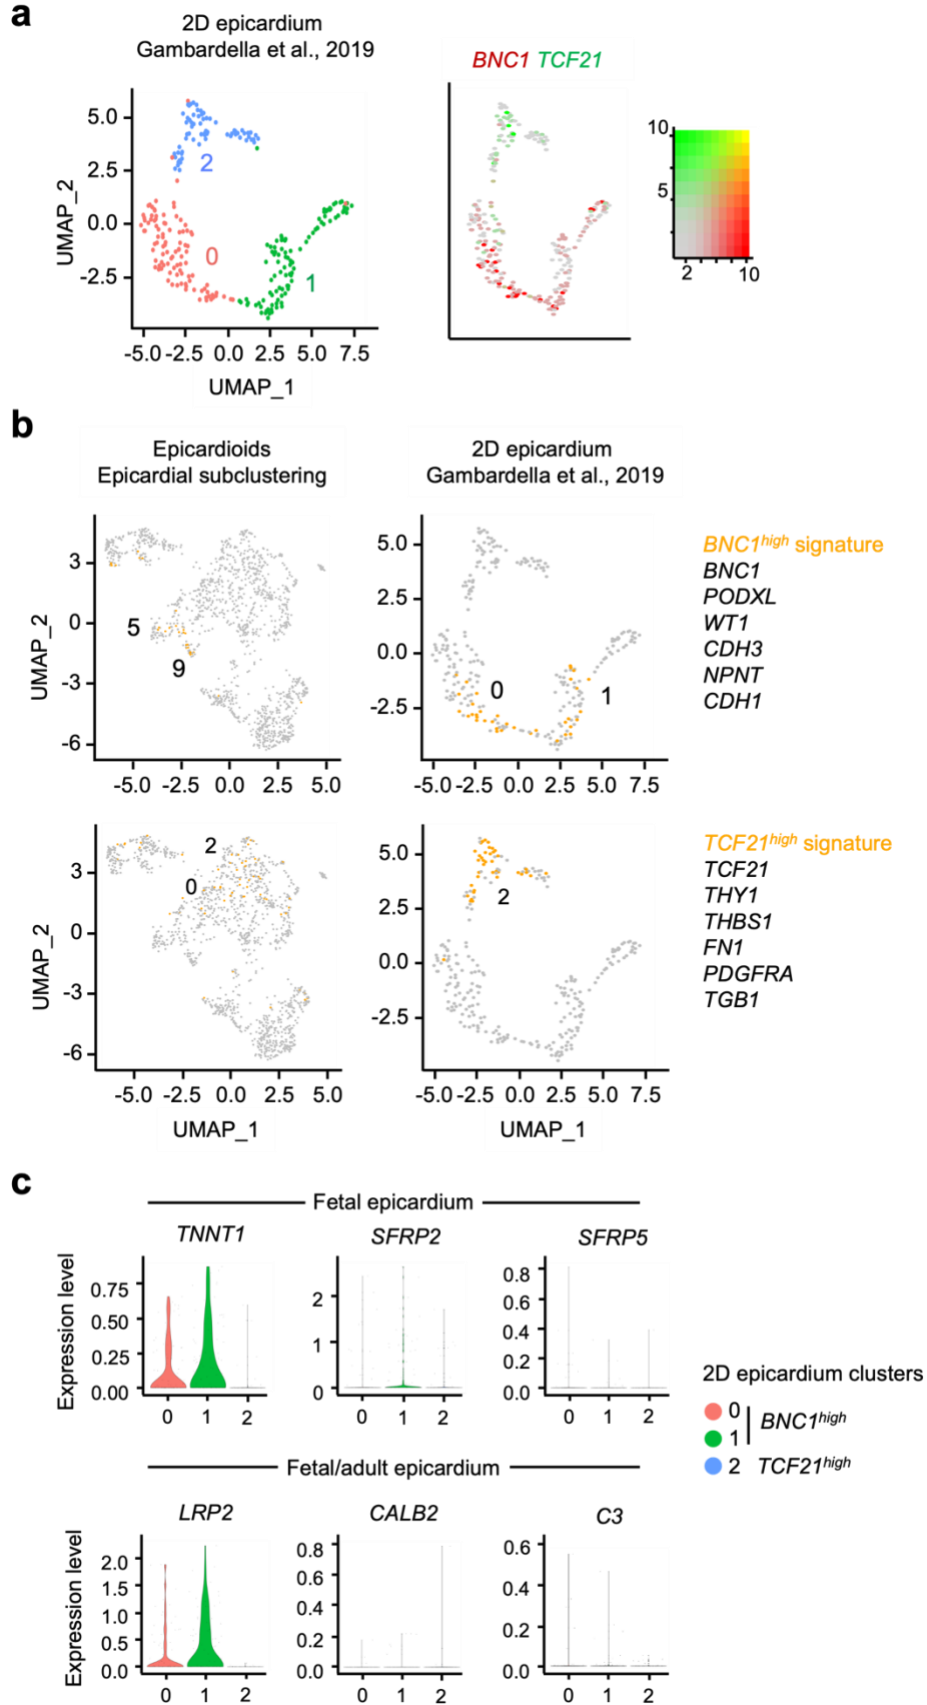

**Supplementary Figure 2. Comparison of the epicardial populations in epicardioids with epicardial cells obtained in 2D differentiation.** (a) (Left) UMAP plot showing the three clusters obtained by reanalyzing the scRNAseq dataset of Gambardella et al. 2019<sup>11</sup>, consisting of epicardial cells obtained by directed 2D differentiation of hiPSCs. (Right) The distinction between *BNC1*<sup>high</sup> and *TCF21*<sup>high</sup> populations reported by Gambardella and colleagues is conserved, as shown by exclusive expression of *BNC1* (red) and *TCF21* (green). (b) (Top) UMAP plots showing cells co-expressing *BNC1*, *PODXL*, *WT1*, *CDH3*, *NPNT*, and *CDH1* (*BNC1*<sup>high</sup> signature reported by Gambardella et al.) in epicardial cells from epicardioids (left) and in 2D epicardial cells from Gambardella et al., 2019 (right). (Bottom) UMAP plots showing cells co-expressing *TCF21*, *THY1*, *THBS1*, *FNI*, *PDGFRA*, and *TGFBI* (*TCF21*<sup>high</sup> signature reported by Gambardella et al) in epicardial cells from epicardioids (left) and in 2D epicardial cells (right). The main clusters matching the signature in each dataset are annotated. (c) Violin plots showing the expression levels of markers of human epicardium in the 2D epicardium clusters from Gambardella et al. *TNNT1*, *SFRP2*, and *SFRP5* are expressed in fetal epicardium; *LRP2*, *CALB2*, and *C3* are shared by fetal and adult epicardium.

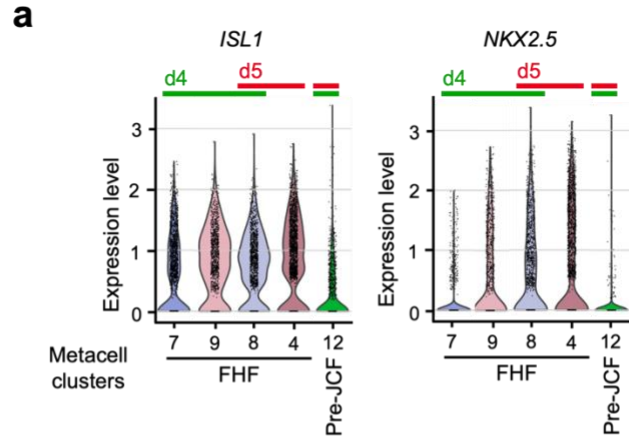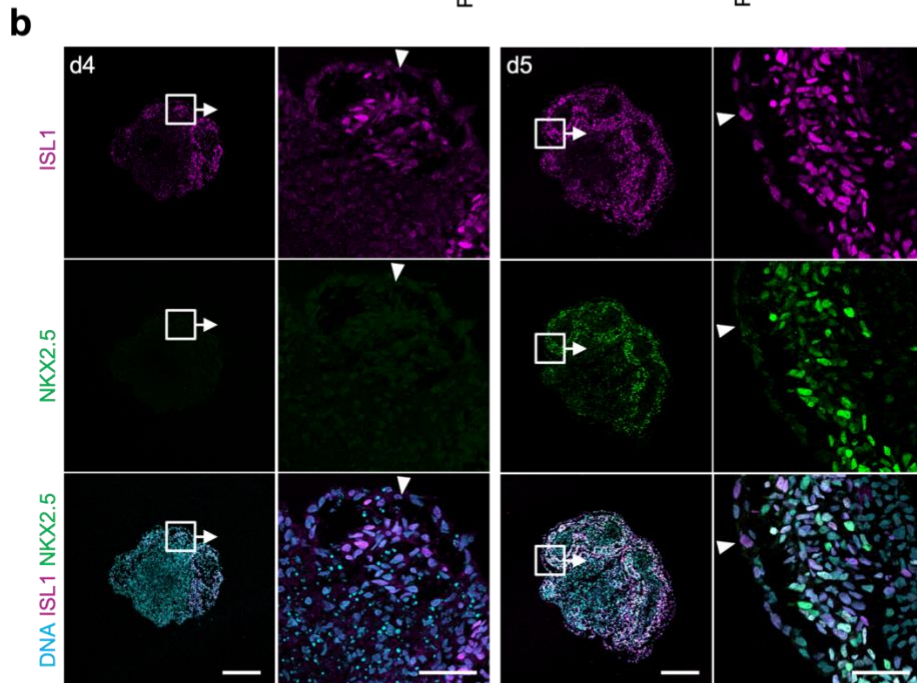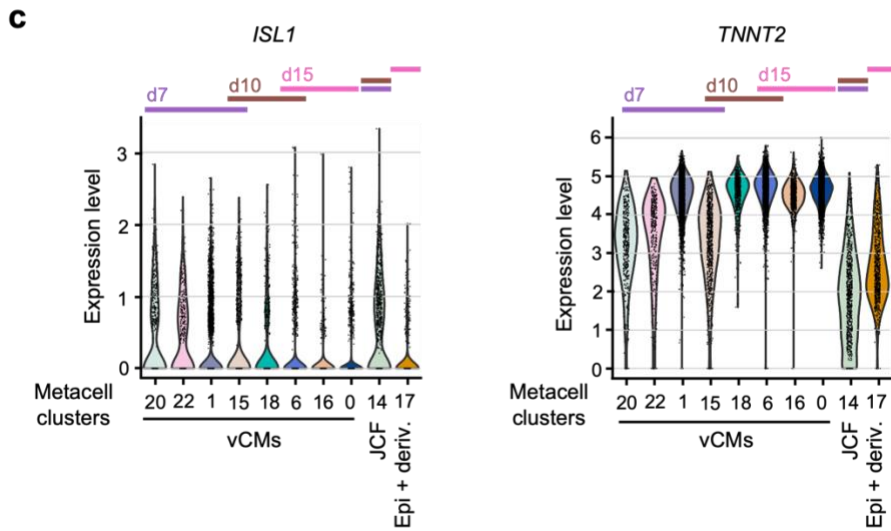

**Supplementary Figure 3. ISL1<sup>+</sup>/NKX2.5<sup>-</sup> JCF progenitors and ISL1<sup>+</sup>/NKX2.5<sup>+</sup> FHF progenitors segregate in early epicardioids.** (a) Violin plots showing the expression levels of *ISL1* and *NKX2.5* in the indicated FHF and pre-JCF metacells clusters, predominantly present in epicardioids at the indicated days. (b) Representative images of immunostaining for ISL1 and NKX2.5 in epicardioids at days 4 (left) and 5 (right). Arrowheads show examples of a layer of ISL1<sup>+</sup>/NKX2.5<sup>-</sup> JCF progenitors segregating from ISL1<sup>+</sup>/NKX2.5<sup>+</sup> FHF progenitors. For each day scale bars left = 200 μm, right = 50 μm. (c) Violin plots showing the expression levels of *ISL1* and *TNNT2* in the indicated vCM, JCF and epicardial metacells clusters, predominantly present in epicardioids at the indicated days. FHF: first heart field; JCF: juxta-cardiac field; vCMs: ventricular cardiomyocytes; Epi + deriv.: epicardium and derivatives.



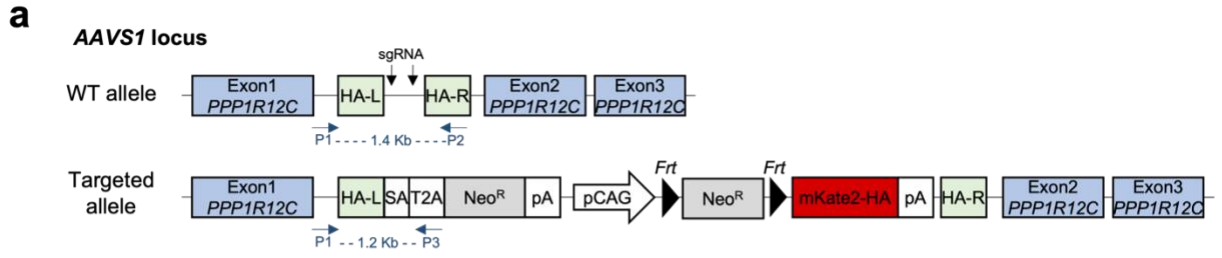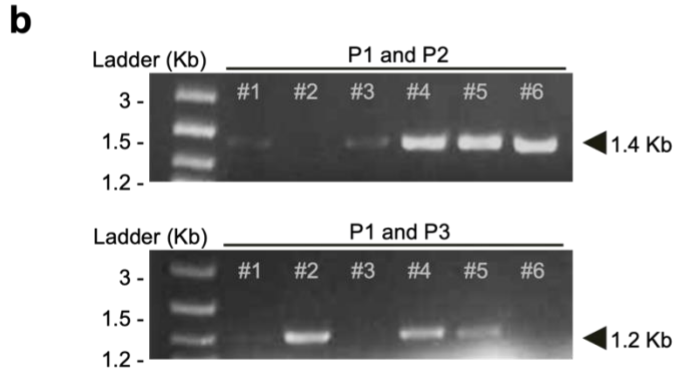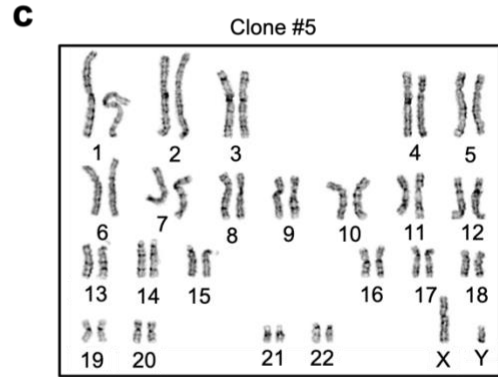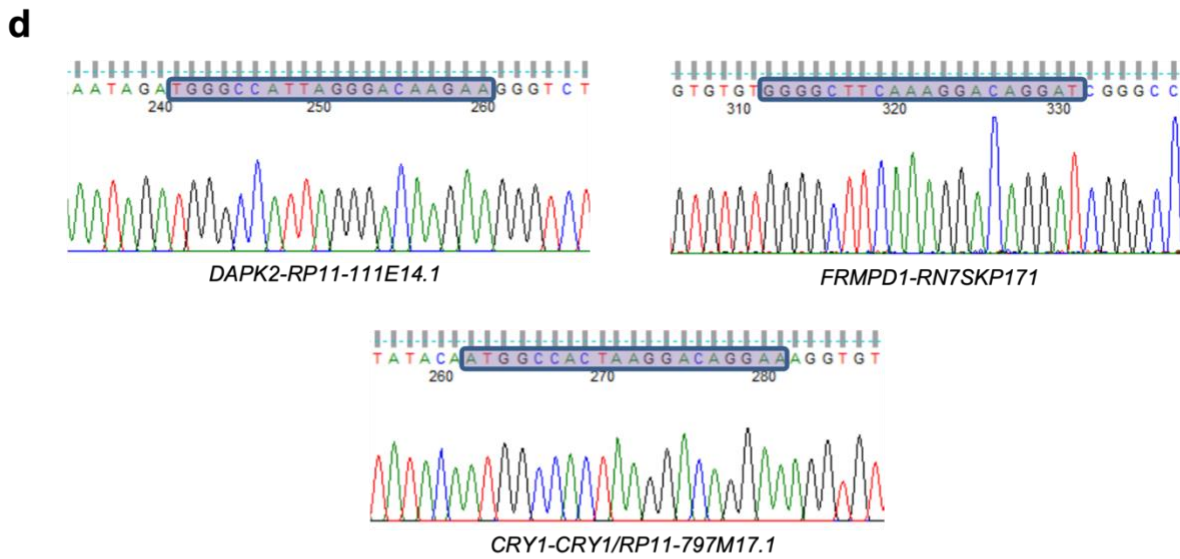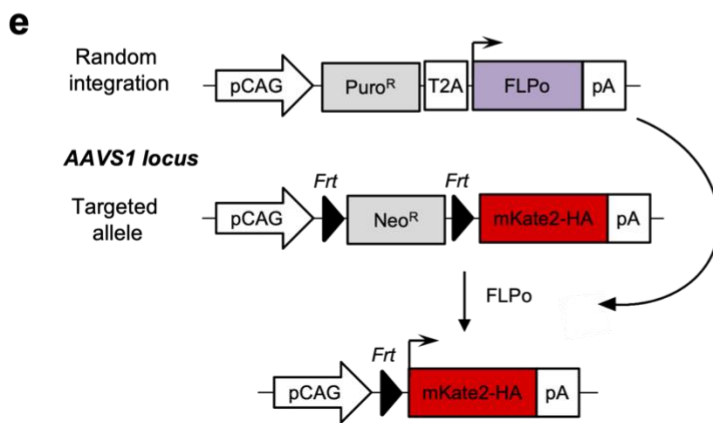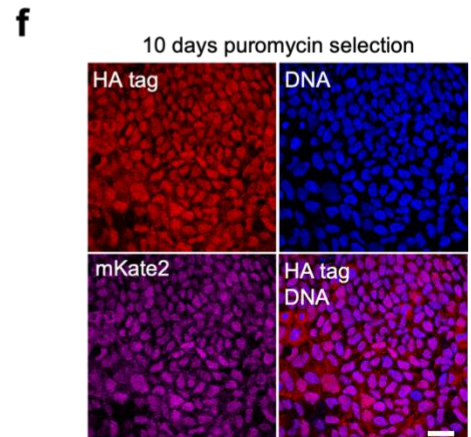

**Supplementary Figure 4. Generation and validation of the AAVS1-CAG-FRT-flanked STOP-mKate2-HA hiPSC reporter line.** (a) Schematic of the *AAVS1* locus targeted with the CAG-FRT-flanked STOP-mKate2-HA construct. Vertical arrows indicate sgRNA targeting sites. Horizontal arrows represent PCR primers for genotyping *AAVS1* locus targeting and homozygosity, respectively. Blue boxes indicate *PPP1R12C* exons; green boxes indicate the regions of homology. (b) Representative PCR genotyping of selected hiPSC clones by amplification of the normal (P1 and P2) and targeted alleles (P1 and P3). N = 45 clones total from 2 independent experiments, #5 selected for further experiments. (c) Normal karyotype of clone #5 confirmed after CRISPR/Cas9 editing. (d) Sanger sequencing of the top 3 predicted off-target sites, confirming no edits at these sites in reporter hiPSCs. (e,f) Schematic of the CAG-Puro-2A-FLPo vector used for validation of reporter expression. Puromycin is used to select cells with random integration of the vector; flippase (FLPo) expression mediates the excision of the STOP cassette (FRT-flanked neomycin) in the targeted *AAVS1* locus, allowing mKate2 expression. (e) Immunostaining for the HA-tag and detection of endogenous mKate2 after transfection with the CAG-Puro-2A-FLPo vector and 10 days of puromycin treatment, representative of 2 independent experiments, confirming that the FLP-FRT system works correctly in reporter hiPSCs. Scale bar = 25  $\mu\text{m}$ . (f)

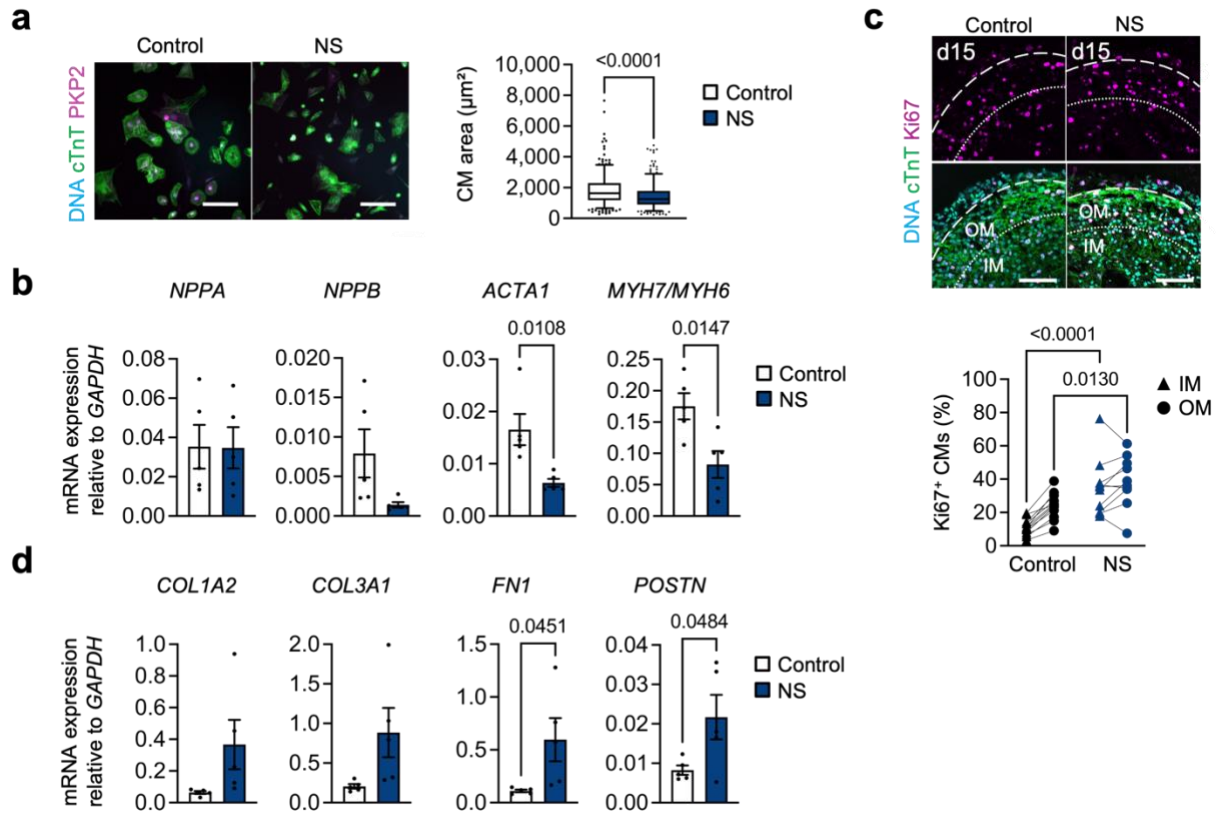

**Supplementary Figure 5. Epicardioids from Noonan syndrome patients show myocytic hyperproliferation rather than classical hypertrophic programs. (a)** (Left) Representative images of cardiomyocytes (CMs) re-seeded after dissociation of day-30 control or Noonan syndrome (NS) epicardioids and stained for cardiac troponin T (cTnT) and the desmosomal marker plakophilin-2 (PKP2). Scale bars = 100  $\mu\text{m}$ . (Right) Corresponding quantification of CM area, box plots indicate the median, 25<sup>th</sup> and 75<sup>th</sup> percentile, with whiskers extending to the 5<sup>th</sup> and 95<sup>th</sup> percentiles. Control: N = 379 CMs, NS: N = 360 CMs; 3 differentiations per group; unpaired two-tailed *t*-test. **(b)** mRNA expression of *NPPA*, *NPPB*, *ACTA1*, and *MYH7/MYH6* ratio relative to *GAPDH* in day-30 control or NS epicardioids. Mean  $\pm$  SEM; N = 5 epicardioids from 3 independent differentiations per group; unpaired two-tailed *t*-test. **(c)** (Top) Representative images of immunostaining for cardiac troponin T (cTnT) and Ki67 in control and NS spheroids at day 15. Hatched lines = outer edge of the myocardium; dotted lines = separation between the outer (OM, 50  $\mu\text{m}$  layer) and inner myocardium (IM). Scale bars = 50  $\mu\text{m}$ . (Bottom) Percentage of Ki67<sup>+</sup> cardiomyocytes (CMs) in the OM and IM of control and NS epicardioids at day 15. Dot plot showing all data points; lines connect the values for OM and IM within the same sample. Control: N = 12 epicardioids; NS: N = 10 epicardioids; 3 independent differentiations per group; two-way

ANOVA with Tukey's multiple comparisons test. **(d)** mRNA expression of *COL1A2*, *COL3A1*, *FNI*, and *POSTN* relative to *GAPDH* in day-30 control or NS epicardioids. Mean  $\pm$  SEM; N = 5 epicardioids from 3 independent differentiations per group; unpaired two-tailed *t*-test.

**Supplementary Table 7.** Sequences of primers used for cloning, genotyping and sequencing of the AAVS1-CAG-Frt-flanked STOP-mKate2HA reporter

| Name                         | Target                                                            | Primers (5'-3')                                                |                                                                                    |                                       |  |
|------------------------------|-------------------------------------------------------------------|----------------------------------------------------------------|------------------------------------------------------------------------------------|---------------------------------------|--|
| Cloning of donor construct   | pCAFNF-GFP plasmid                                                | Pacl_Sv40-PolyA_Fw                                             | CCTTAATTAACGAAATGACCGACCAAGCGA                                                     |                                       |  |
|                              |                                                                   | EcoRI_Sv40-PolyA_Rv                                            | CCGGAATCCGGATTTGATCCAGACATGA                                                       |                                       |  |
|                              | p3E-mKate2-HA no-pA plasmid                                       | SwaI_mKate2-HA_Fw                                              | GGTACGATTTAAATCATGGTGAGCGAGCTGATTAA                                                |                                       |  |
|                              |                                                                   | Pacl_mKate2-HA_Rv                                              | CCGGTTAATTAATTATGCTGCGTAGTCTGGTACGTCGT                                             |                                       |  |
| Name                         | Target                                                            | Primers (5'-3')                                                |                                                                                    |                                       |  |
| Construct sequencing primers | pAAVS1- CAG- Frt-flanked STOP - mKate2HA-polyA plasmid            | AAVS1_mKate2_Fw1                                               | CAAGGGGGAGGATTGGGAAGA                                                              |                                       |  |
|                              |                                                                   | AAVS1_mKate2_Fw2                                               | TTCCTTTTATGGCGAGGCGG                                                               |                                       |  |
|                              |                                                                   | AAVS1_mKate2_Fw3                                               | GGGGGTGGCGGCAGGTGGGG                                                               |                                       |  |
|                              |                                                                   | AAVS1_mKate2_Fw4                                               | GAATTGATTAATTCGAGCGAACGCG                                                          |                                       |  |
|                              |                                                                   | AAVS1_mKate2_Rv5                                               | AGGAACCTCTCGGATTTGATCCAGA                                                          |                                       |  |
|                              |                                                                   | AAVS1_mKate2_Fw6                                               | TCTGGATCAAATCCGAGAAGTTCCT                                                          |                                       |  |
|                              |                                                                   | AAVS1_mKate2_Fw7                                               | GGACACCAGCCTCCAGGACG                                                               |                                       |  |
|                              |                                                                   | AAVS1_mKate2_Fw8                                               | TTAATTAACGAAATGACCGACC                                                             |                                       |  |
|                              |                                                                   | AAVS1_mKate2_Rv9                                               | GGTGGCCACTGAGAACCGGG                                                               |                                       |  |
| Name                         | Target                                                            | Primers (5'-3') for PCR screening                              |                                                                                    |                                       |  |
| Genotyping                   | AAVS1 locus after CAG- Frt-flanked STOP -mKate2HA-polyA insertion | P1_Fw                                                          | TCGACTTCCCCTCTTCCGATG                                                              |                                       |  |
|                              |                                                                   | P2_Rv                                                          | CTCAGGTTCTGGGAGAGGGTAG                                                             |                                       |  |
|                              |                                                                   | P3_Rv                                                          | GAGCCTAGGGCCGGGATTCTC                                                              |                                       |  |
|                              |                                                                   | Primers (5'-3') for PCR amplification                          |                                                                                    | Primers (5'-3') for Sanger sequencing |  |
|                              |                                                                   | Fw:TCGACTTCCCCTCTTCCGATG<br>Rv: GAGCCTAGGGCCGGGATTCTC          | Fw:GGACCACCTTATATTCCCAGGGC<br>Rv:GAGCCTAGGGCCGGGATTCTC<br>Rv:GGCTAAAGCCAGGGAGACGGG |                                       |  |
|                              |                                                                   | Fw:GGACCACCTTATATTCCCAGGGC<br>Rv: TAGAAGGCACAGTCGAGG           | Fw:GGACCACCTTATATTCCCAGGGC<br>Rv: TAGAAGGCACAGTCGAGG                               |                                       |  |
|                              |                                                                   | Fw: GAATTGATTAATTCGAGCGAACGCG<br>Rv: AGGAACCTCTCGGATTTGATCCAGA | Fw: GAATTGATTAATTCGAGCGAACGCG<br>Fw: CGTTGGCTACCCGTGATATT                          |                                       |  |

|                     |                                |                                                                 |                                                                                                                     |
|---------------------|--------------------------------|-----------------------------------------------------------------|---------------------------------------------------------------------------------------------------------------------|
|                     |                                |                                                                 | Rv: AGGAACTTCTCGGATTTGATCCAGA<br>Rv: GCCCAGTCATAGCCGAATAG                                                           |
|                     |                                | Fw: TCTGGATCAAATCCGAGAAGTTCCT<br>Rv: GAATTCCGGATTTGATCCAGACATGA | Fw: TCTGGATCAAATCCGAGAAGTTCCT<br>Fw: GGACACCAGCCTCCAGGACG<br>Fw: TTAATTAACGAAATGACCGACC<br>Rv: TGACGTTGTAGATGAGGCAG |
|                     |                                | Fw: CTTAATTAACGAAATGACCGACCAAGCGA<br>Rv: CCAAGTAGGTGGCCTGGGGC   | Fw: CTTAATTAACGAAATGACCGACCAAGCGA<br>Rv: CTCAGGTTCTGGGAGAGGGTAG<br>Rv: CCAAGTAGGTGGCCTGGGGC                         |
|                     |                                |                                                                 |                                                                                                                     |
| Off-target analysis | <b>Target</b>                  | <b>Off target gRNA</b>                                          | <b>Primers (5'-3') PCR amplification and sequencing</b>                                                             |
|                     | <i>DAPK2-RP11-111E14.1</i>     | TGGGCCATTAGGGACAAGAA                                            | Fw: CACAGAGACATGTCTCTTTGTG<br>Rv: GACAATGGCACATCTGATCCAG                                                            |
|                     | <i>FRMPD1-RN7SKP171</i>        | GGGGCTTCAAAGGACAGGAT                                            | Fw: AGCTCCGGAGATGATCAAGTACAG<br>Rv: AAAGTGCATGCAGTTCCGTAGTG                                                         |
|                     | <i>CRY1-CRY1/RP11-797M17.1</i> | ATGGCCACTAAGGACAGGAA                                            | Fw: CAGTGCTCTGATCCCTAGAAGGAC<br>Rv: TGTGAATTTAGACGTGGGACTG                                                          |

**Supplementary Table 8. Primary antibodies**

| <b>Target</b> | <b>Host species</b> | <b>Manufacturer</b>                     | <b>Catalog number</b> | <b>Concentration</b>                         |
|---------------|---------------------|-----------------------------------------|-----------------------|----------------------------------------------|
| $\alpha$ -SMA | Mouse               | Sigma-Aldrich                           | A2547                 | 1:400 (IF)                                   |
| CD31          | Sheep               | R&D                                     | AF806                 | 1:200 (IF)                                   |
| Collagen III  | Rabbit              | Invitrogen                              | PA5-34787             | 1:100 (IF)                                   |
| cTnT          | Mouse               | Invitrogen                              | MA512960              | 1:300 (IF)                                   |
| cTnT          | Rabbit              | Abcam                                   | ab92546               | 1:300 (IF)                                   |
| E-cadherin    | Mouse               | Abcam                                   | ab1416                | 1:100 (IF)                                   |
| Fibronectin   | Rabbit              | Abcam                                   | ab2413                | 1:400 (IF)                                   |
| HA tag        | Rabbit              | Abcam                                   | ab9110                | 1:200 (IF)                                   |
| Ki67          | Mouse               | BD Biosciences                          | 556003                | 1:300 (IF)                                   |
| KRT18         | Mouse               | Abcam                                   | ab668                 | 1:100 (IF)                                   |
| IGF1R         | Goat                | R&D                                     | AF-305                | 1:100 (IF)                                   |
| IGF2          | Mouse               | Invitrogen                              | MA5-17096             | 1:100 (IF)                                   |
| ISL1          | Mouse               | Developmental Studies<br>Hybridoma bank | 39.4D5                | 1:100 (IF)                                   |
| NRP2          | Goat                | R&D                                     | AF2215                | 1:100 (IF)<br>200, 500 $\mu$ g/mL (blocking) |
| NKX2.5        | Rabbit              | Novus Biologicals                       | NBP1-31558            | 1:100 (IF)                                   |
| PKP2          | Guinea pig          | Origene                                 | AP09554SU-N           | 1:100 (IF)                                   |
| TCF21         | Rabbit              | Sigma-Aldrich                           | HPA013189             | 1:100 (IF)                                   |
| TBX18         | Rabbit              | Abcam                                   | ab115262              | 1:100 (IF)                                   |
| Vimentin      | Chicken             | Abcam                                   | ab24525               | 1:400 (IF)                                   |
| VE-cadherin   | Mouse               | Invitrogen                              | 14-1449-82            | 1:200 (IF)                                   |
| TJP1          | Mouse               | Invitrogen                              | 33-9100               | 1:100 (IF)                                   |
| Twist1        | Sheep               | R&D                                     | AF6230                | 1:50 (IF)                                    |

IF: immunofluorescence

**Supplementary Table 9.** Secondary antibodies

| <b>Target species</b> | <b>Host species</b> | <b>Conjugate</b> | <b>Manufacturer</b> | <b>Catalog number</b> | <b>Concentration</b> |
|-----------------------|---------------------|------------------|---------------------|-----------------------|----------------------|
| Rabbit                | Goat                | Alexa Fluor 488  | Invitrogen          | A11008                | 1:500                |
| Rabbit                | Goat                | Alexa Fluor 647  | Invitrogen          | A32733                | 1:500                |
| Mouse                 | Goat                | Alexa Fluor 594  | Invitrogen          | A11005                | 1:500                |
| Mouse                 | Goat                | Alexa Fluor 488  | Invitrogen          | A11001                | 1:500                |
| Guinea pig            | Goat                | Alexa Fluor 594  | Invitrogen          | A11076                | 1:500                |
| Chicken               | Goat                | Alexa Fluor 594  | Invitrogen          | A11042                | 1:500                |
| Donkey                | Sheep               | Alexa Fluor 488  | Invitrogen          | A11015                | 1:500                |

**Supplementary Table 10.** Conditions of single-cell dissociation of epicardioids

| <b>Time point</b> | <b>Number of epicardioids</b> | <b>Dissociation time</b> |
|-------------------|-------------------------------|--------------------------|
| Day 2             | 13                            | 45 min                   |
| Day 3             | 11                            | 45 min                   |
| Day 4             | 10                            | 45 min                   |
| Day 5             | 8                             | 45 min                   |
| Day 7             | 8                             | 50 min                   |
| Day 10            | 6                             | 50 min                   |
| Day 15            | 6                             | 55 min                   |
| Day 30            | 6                             | 60 min                   |



**Supplementary Table 11.** qPCR primers

| Gene          | Species | Sequence |                            |
|---------------|---------|----------|----------------------------|
| <i>ACTA1</i>  | Human   | Forward  | 5' GTGATCACCATCGGAAATGAA   |
|               |         | Reverse  | 5' TCATGATGCTGTTGTAGGTGGT  |
| <i>COL1A2</i> | Human   | Forward  | 5' CCTGGTGCTAAAGGAGAAAGAGG |
|               |         | Reverse  | 5' ATCACCACGACTTCCAGCAGGA  |
| <i>COL3A1</i> | Human   | Forward  | 5' TGGTCTGCAAGGAATGCCTGGA  |
|               |         | Reverse  | 5' TCTTCCCTGGGACACCATCAG   |
| <i>GAPDH</i>  | Human   | Forward  | 5' TCCTCTGACTTCAACAGCGA    |
|               |         | Reverse  | 5' GGGTCTTACTCCTTGGAGGC    |
| <i>MYH6</i>   | Human   | Forward  | 5' TCAGGATTCTCCGTGAAGGG    |
|               |         | Reverse  | 5' CTCTTCCTTGTCATCGGGCA    |
| <i>MYH7</i>   | Human   | Forward  | 5' TGTAGACACACTTGAGTAGCCC  |
|               |         | Reverse  | 5' ACGGTCACTGTCTTGCCATA    |
| <i>NPPA</i>   | Human   | Forward  | 5' CAACGCAGACCTGATGGATTT   |
|               |         | Reverse  | 5' AGCCCCGCTTCTTCATTC      |
| <i>NPPB</i>   | Human   | Forward  | 5' CAGCCTCGGACTTGGAAAC     |
|               |         | Reverse  | 5' GCTCCAGGGATGTCTGCTC     |
| <i>FN1</i>    | Human   | Forward  | 5' CTGGCCAGTCCTACAACCAG    |
|               |         | Reverse  | 5' CGGGAATCTTCTCTGTCAGCC   |
| <i>POSTN</i>  | Human   | Forward  | 5' CCGAGCCTTGTATGTATGTTATG |
|               |         | Reverse  | 5' TTTGTACACCAAGCACCTATTT  |
