# Supplementary material for: Epicardioid single-cell genomics uncovers principles of human epicardium biology in heart development and disease
Source: PubMed Central journal article supplement (PMC10713454; doi:10.1038/s41587-023-01718-7), 2023-04-03
Supplement: 41587_2023_1718_MOESM8_ESM.pdf [file 41587_2023_1718_MOESM8_ESM.pdf]

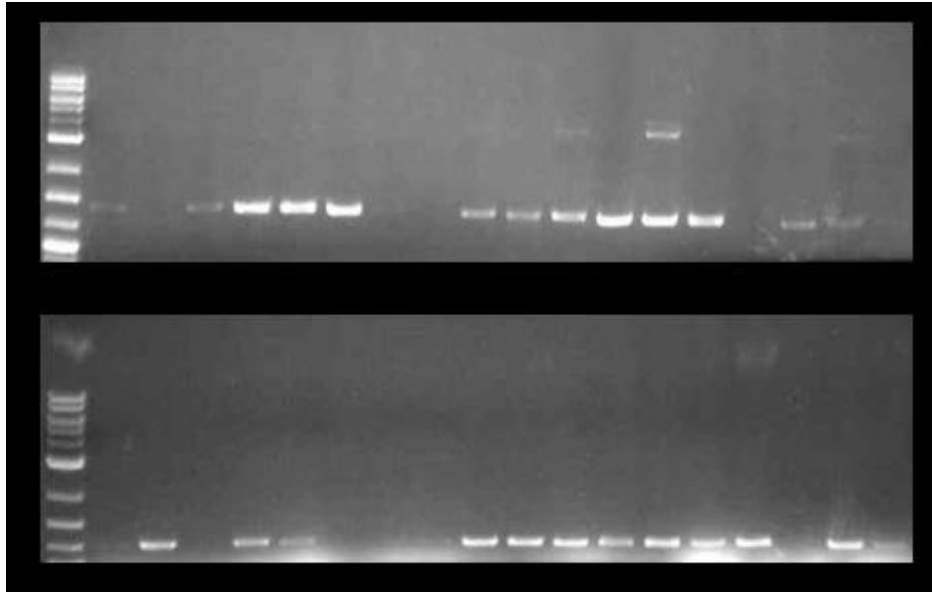

Uncropped scans of the PCR gels presented in Supplementary Figure 4b.
